# Supplementary material for: Clostridium difficile Colonizes Alternative Nutrient Niches during Infection across Distinct Murine Gut Microbiomes
Source: PubMed Central journal article supplement (PMC5527303; doi:10.1128/msystems.00063-17), 2017-07-25

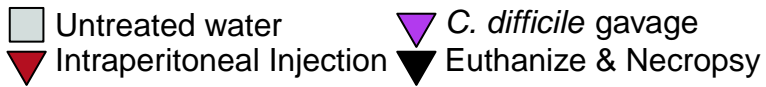

Streptomycin (SPF)

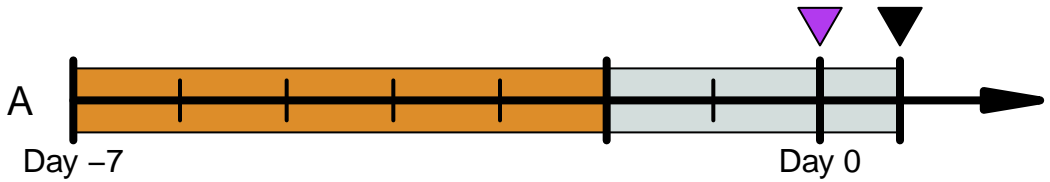

Cefoperazone (SPF)

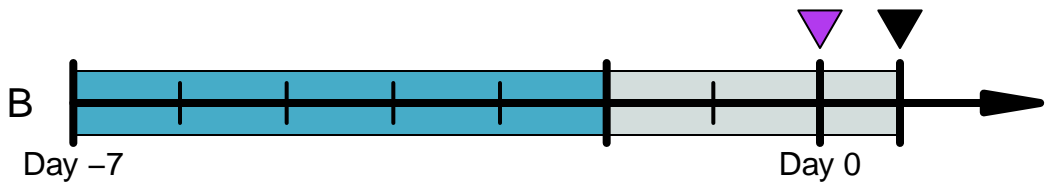

Clindamycin (SPF)

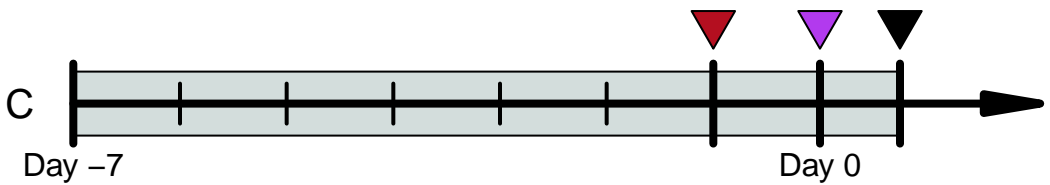

No Antibiotics (SPF & GF)

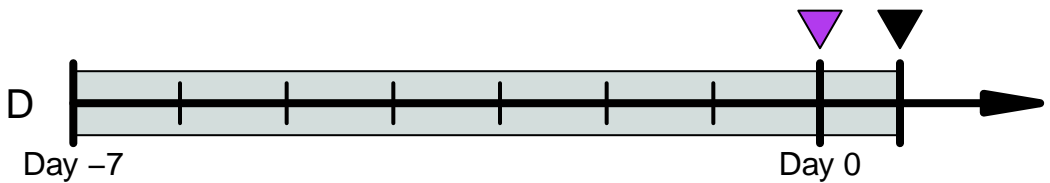

Supplement: sys004172122sf1.pdf [file sys004172122sf1.pdf]
