# Supplementary material for: Clostridium difficile Colonizes Alternative Nutrient Niches during Infection across Distinct Murine Gut Microbiomes
Source: PubMed Central journal article supplement (PMC5527303; doi:10.1128/msystems.00063-17), 2017-07-25

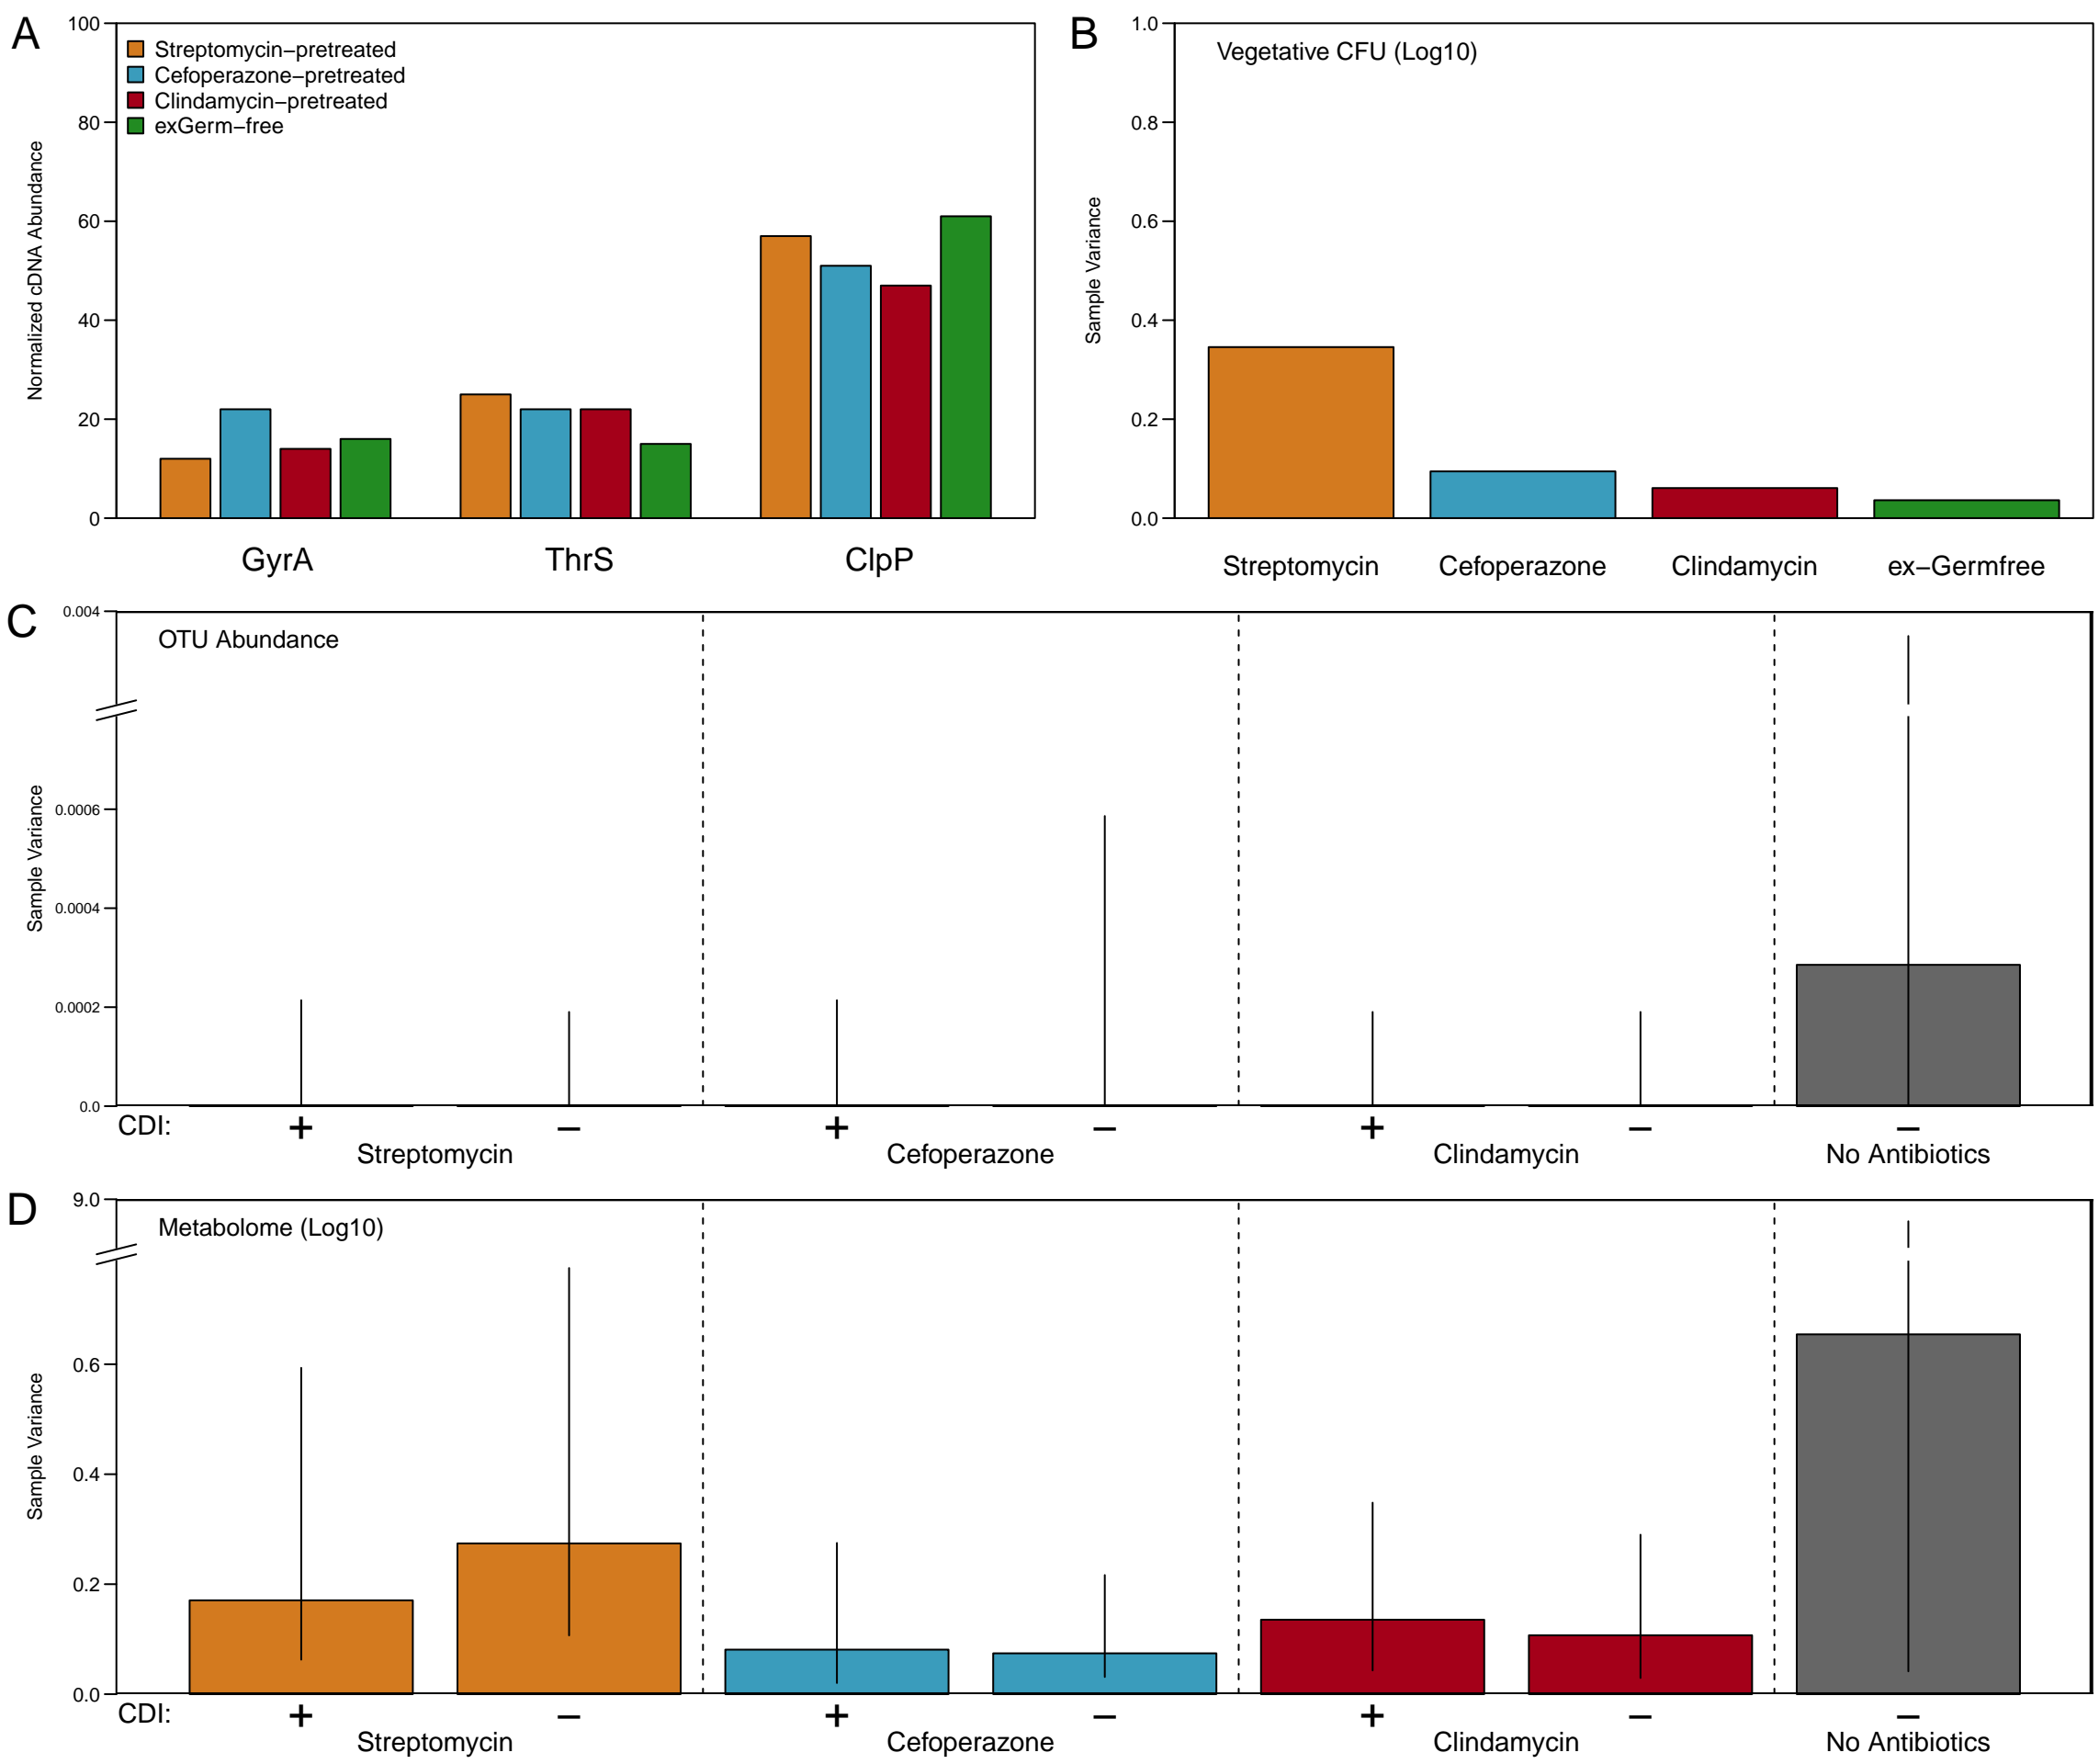

Supplement: sys004172122sf3.pdf [file sys004172122sf3.pdf]
